# Supplementary material
Source: publisher site journal article supplement (https://www.dovepress.com/article/465244)
Supplement: Supplementary file 1 [file get_supplementary_file.php]

SUPPLEMENTAL TABLE 1. The patient main laboratory test data.

| Item | Value | Reference range |
| --- | --- | --- |
| White blood cell | 11.70(x109/L) | (5.6-14.5)x10~9/L |
| Neutrophil ratio | 67.40% | (7-51)% |
| Neutrophil count | 7.88(x10^9/L) | (0.6-7.1)x10^9/L |
| Hemoglobin | 164(g/L) | (99-196)g/L |
| Platelets | 221(x10~9/L | (203-653) x10~9/L |
| C-Reactive protein | 3.26(mg/L) | (0-2)mg/L |

SUPPLEMENTAL TABLE 2. Quality control data for Optical genome mapping was conducted in this study.

| Items | Datas |
| --- | --- |
| Reference | hg38_DLE1_0kb_0labels.cmap |
| Reference Length | 3,088,269,832 bp |
| Enzyme | DLE-1 |
| Site | CTTAAG |
| Maximum molecule length | 2.83 Mbp |
| N50 (>= 20 kbp) | 108.75 kbp |
| Total DNA (>= 20kbp) | 1,593.56 Gbp |
| N50 (>= 150kbp) | 216 kbp |
| Total DNA (>= 150kbp) | 510.11 Gbp |
| N50 (>= 150kbp and min sites >=9) | 217.13 kbp |
| Total DNA (>= 150kbp and min sites >= 9) | 486.88 Gbp |
| Map rate | 88.10% |
| Effective coverage | 138.89 |
| Average label density (>= 150kbp) | 15.5 /100kbp |
| Positive label variance | 3.51 |
| Negative label variance | 6.95 |
| Base pairs per pixel | 473.83 |
